# Supplementary material for: A Thermotolerant Marine Bacillus amyloliquefaciens S185 Producing Iturin A5 for Antifungal Activity against Fusarium oxysporum f. sp. cubense
Source: MDPI journal article supplement (doi:10.3390/md19090516), 2021-09-11
Supplement: s1 [file s1]

**Figure S1.** The  $^1\text{H}$  spectra of compound 1 in  $\text{DMSO-d}_6$ .

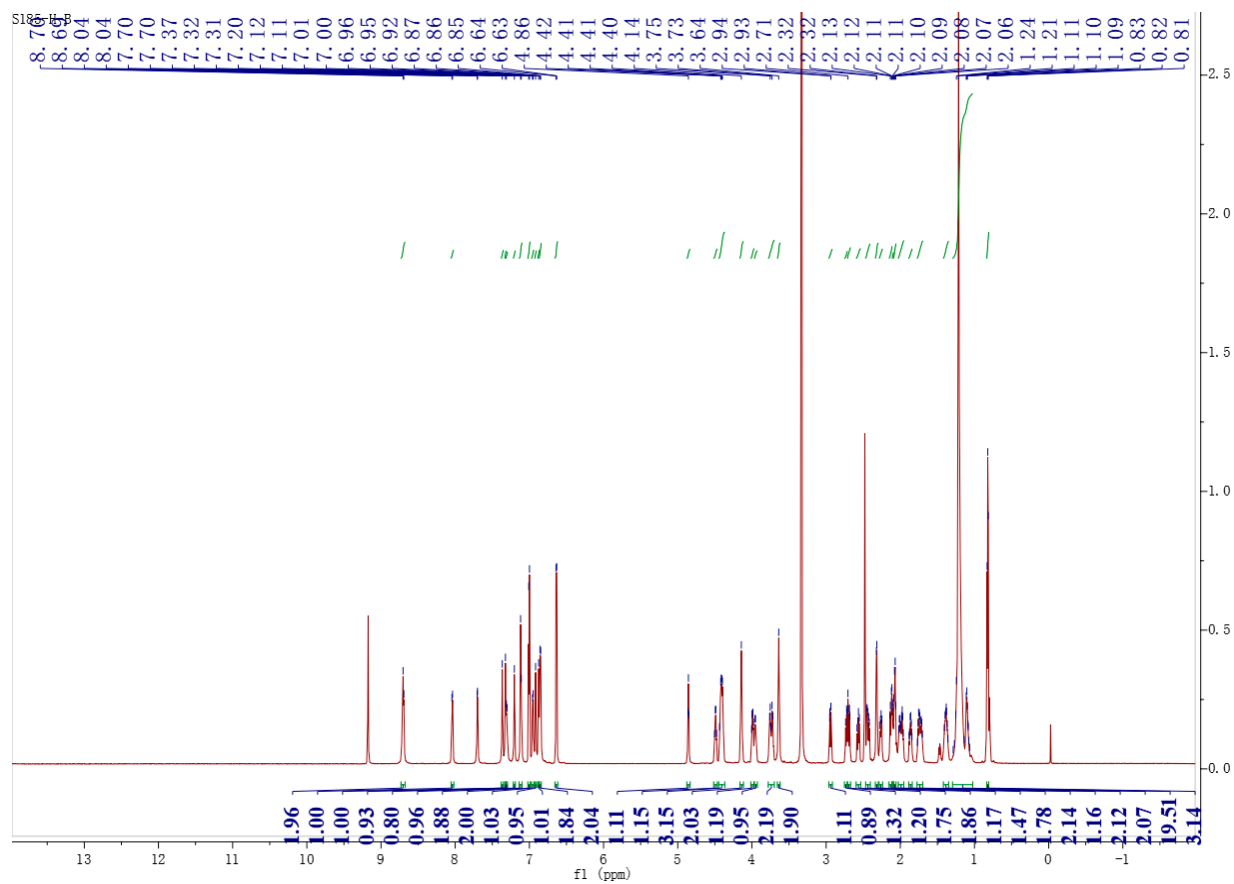

**Figure S2.** The  $^{13}\text{C}$  spectra of compound 1 in  $\text{DMSO-d}_6$ .

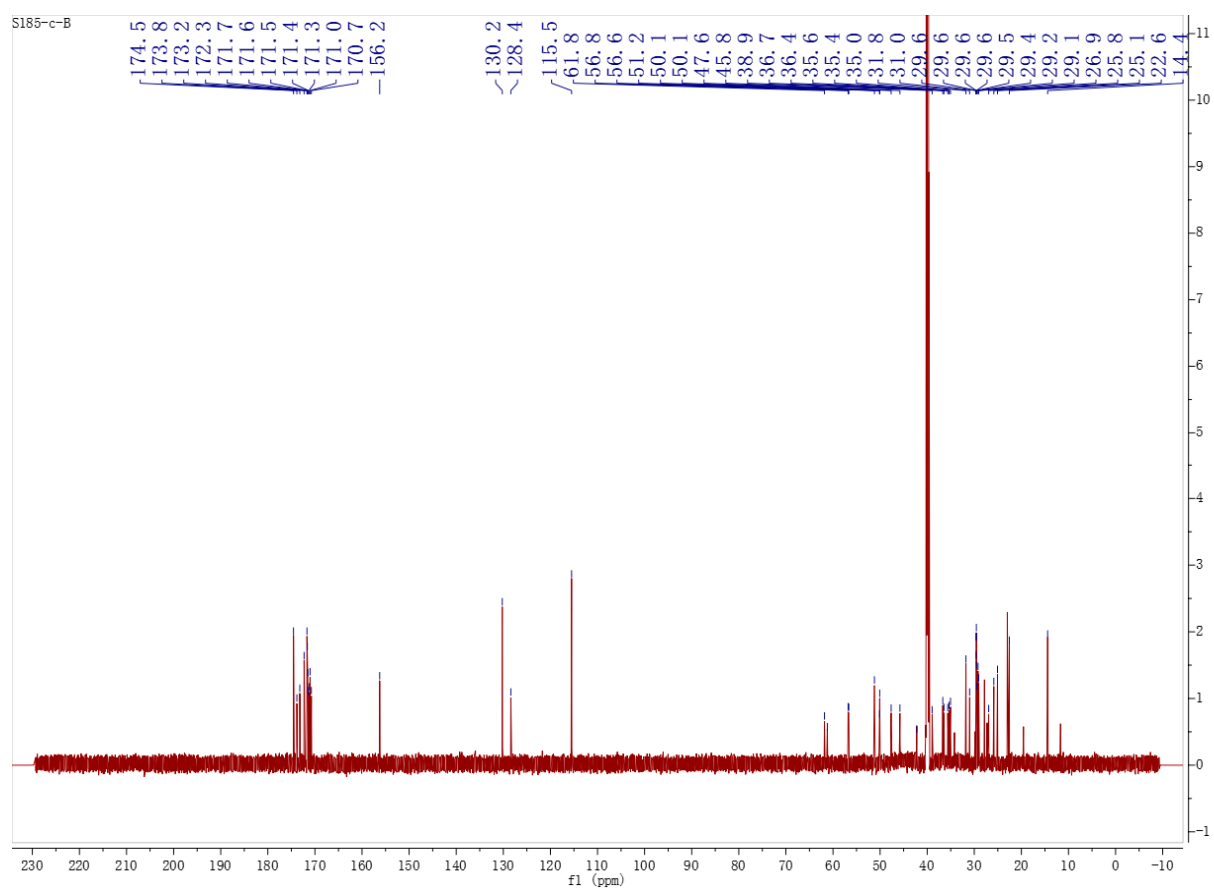

**Table S1.** Antifungal and plant growth promoting features of thermotolerant marine *Bacillus amyloliquefaciens* S185.

| Parameters                                                   | <i>Bacillus amyloliquefaciens</i> S185 |
|--------------------------------------------------------------|----------------------------------------|
| <b>Antifungal Activity (% Inhibition)</b>                    |                                        |
| <i>Fusarium oxysporum</i> f. sp. <i>cubense</i>              | 78                                     |
| <b>Plant Growth Promoting Traits</b>                         |                                        |
| Siderophore production                                       | -                                      |
| Phosphate solubilization                                     | -                                      |
| HCN production                                               | -                                      |
| Ammonia production                                           | +                                      |
| <b>Indole Acetic Acid (<math>\mu\text{g ml}^{-1}</math>)</b> |                                        |
| Absence of Tryptophan                                        | 57.13 $\pm$ 1.32                       |
| Presence of Tryptophan (0.5 %)                               | 93.96 $\pm$ 2.28                       |

(+) = Positive; (-) =Negative

**Table S2.** List of carbon sources utilized by S185 in GNIII Biolog plate.

| S. No. | Carbon Sources                  |
|--------|---------------------------------|
| 1      | Dextrin                         |
| 2      | D-Turanose                      |
| 3      | D-Salicin                       |
| 4      | N-Acetyl-D-Glucosamine          |
| 5      | N-Acetyl- $\beta$ -DMannosamine |
| 6      | N-Acetyl-D-Galactosamine        |
| 7      | N-AcetylNeuraminic Acid         |
| 8      | D-Fructose                      |
| 9      | D-Galactose                     |
| 10     | 3-Methyl Glucose                |
| 11     | D-Fucose                        |
| 12     | L-Fucose                        |
| 13     | Inosine                         |
| 14     | D-Sorbitol                      |
| 15     | D-Mannitol                      |
| 16     | D-Arabitol                      |
| 17     | myo-Inositol                    |
| 18     | Glycerol                        |
| 19     | D-Glucose-6-PO <sub>4</sub>     |
| 20     | D-Fructose-6-PO <sub>4</sub>    |
| 21     | D-Aspartic Acid                 |
| 22     | D-Serine                        |
| 23     | Glycyl-L-Proline                |
| 24     | L-Alanine                       |
| 25     | L-Arginine                      |
| 26     | L-Aspartic Acid                 |
| 27     | L-Glutamic Acid                 |
| 28     | L-Histidine                     |
| 29     | L-Serine                        |
| 30     | Lincomycin                      |
| 31     | Niaproof 4                      |
| 32     | Pectin                          |
| 33     | D-Gluconic Acid                 |
| 34     | D-Glucuronic Acid               |
| 35     | Glucuronamide                   |
| 36     | Mucic Acid                      |
| 37     | Quinic Acid                     |
| 38     | Tetrazolium Violet              |
| 39     | Tetrazolium Blue                |
| 40     | L-Lactic Acid                   |

**Table S3.** Inhibitory effect of compound 1 extracted from S185 on the growth of *Fusarium oxysporum* f. sp. *cubense*.

| Concentration of compound 1 (µg/disk) | Diameter of inhibition zone(mm) |
|---------------------------------------|---------------------------------|
| 0 (Control)                           | -                               |
| 25                                    | 7.67                            |
| 50                                    | 9.67                            |
| 100                                   | 12.33                           |
| 200                                   | 13.33                           |
| 400                                   | 14.33                           |

(-)=Negative

**Table S4.** NMR spectroscopic data for compound 1, iturin A2 and iturin A5 in DMSO-d<sub>6</sub>.

| Position           | Compound 1 |                     | Iturin A2  |                      | Iturin A5  |                      |
|--------------------|------------|---------------------|------------|----------------------|------------|----------------------|
|                    | $\delta_C$ | $\delta_H$ , m      | $\delta_C$ | $\delta_H$ , m       | $\delta_C$ | $\delta_H$ , m       |
| 1                  | 51.2       | 4.44, m             | 50.8       | 4.42, m              | 50.8       | 4.42, m              |
| 2                  | 36.7       | 2.28, dd<br>2.14, m | 36.3       | 2.29, dd<br>2.16, dd | 36.3       | 2.29, dd<br>2.16, dd |
| 3                  | 171.3      |                     | 170.8      |                      | 170.8      |                      |
| 4                  | 173.8      |                     | 173.3      |                      | 173.3      |                      |
| 1-NH               |            | 7.70, d             |            | 7.70, d              |            | 7.70, d              |
| 3-NH <sub>2</sub>  |            | 7.32, s<br>6.92, s  |            | 7.31, s<br>6.89, s   |            | 7.31, s<br>6.89, s   |
| 5                  | 56.8       | 4.00, m             | 56.3       | 4.02, m              | 56.3       | 4.02, m              |
| 6                  | 35.4       | 2.95, dd<br>2.74, m | 34.9       | 2.96, dd<br>2.73, dd | 34.9       | 2.96, dd<br>2.73, dd |
| 7                  | 128.4      |                     | 127.9      |                      | 127.9      |                      |
| 8                  | 130.2      | 7.01, d             | 129.7      | 7.01, d              | 129.7      | 7.01, d              |
| 9                  | 115.5      | 6.64, d             | 115.0      | 6.65, d              | 115.0      | 6.65, d              |
| 10                 | 156.2      |                     | 155.8      |                      | 155.8      |                      |
| 11                 | 115.5      | 6.64, d             | 115.0      | 6.65, d              | 115.0      | 6.65, d              |
| 12                 | 130.2      | 7.01, d             | 129.7      | 7.01, d              | 129.7      | 7.01, d              |
| 13                 | 171.6      |                     | 171.1      |                      | 171.1      |                      |
| 5-NH               |            | 8.70, d             |            | 8.68, d              |            | 8.68, d              |
| 14                 | 51.2       | 4.44, m             | 50.8       | 4.43, m              | 50.8       | 4.43, m              |
| 15                 | 36.4       | 2.58, dd<br>2.46, m | 36.0       | 2.58, dd<br>2.47, dd | 36.0       | 2.58, dd<br>2.47, dd |
| 16                 | 171.7      |                     | 171.2      |                      | 171.2      |                      |
| 17                 | 170.7      |                     | 170.3      |                      | 170.3      |                      |
| 14-NH              |            | 8.04, d             |            | 8.04, d              |            | 8.04, d              |
| 16-NH <sub>2</sub> |            | 7.20, s<br>6.87, s  |            | 7.19, s<br>6.85, s   |            | 7.19, s<br>6.85, s   |
| 18                 | 50.1       | 4.50, m             | 49.6       | 4.51, m              | 49.6       | 4.51, m              |
| 19                 | 26.9       | 2.02, m<br>1.77, m  | 26.5       | 2.03, m<br>1.75, m   | 26.5       | 2.03, m<br>1.75, m   |
| 20                 | 31.0       | 2.09, m             | 30.5       | 2.09, m              | 30.5       | 2.09, m              |
| 21                 | 174.5      |                     | 174.0      |                      | 174.0      |                      |
| 22                 | 171.5      |                     | 171.0      |                      | 171.0      |                      |
| 18-NH              |            | 6.96, d             |            | 6.91, d              |            | 6.91, d              |
| 21-NH <sub>2</sub> |            | 7.12, s<br>6.86, d  |            | 7.10, s<br>6.82, s   |            | 7.10, s<br>6.82, s   |
| 23                 | 61.2       | 4.14, s             | 60.8       | 4.16, m              | 60.8       | 4.16, m              |
| 24                 | 29.4       | 2.11, m<br>1.77, m  | 29.0       | 2.12, m<br>1.74, m   | 29.0       | 2.12, m<br>1.74, m   |
| 25                 | 25.1       | 1.98, m<br>1.88, m  | 24.6       | 1.98, m<br>1.88, m   | 24.6       | 1.98, m<br>1.88, m   |
| 26                 | 47.6       | 3.76, m             | 47.2       | 3.75, m              | 47.2       | 3.75, m              |
| 27                 | 173.2      |                     | 172.7      |                      | 172.7      |                      |
| 28                 | 50.1       | 4.44, m             | 49.7       | 4.42, m              | 49.7       | 4.42, m              |
| 29                 | 35.6       | 2.71, dd<br>2.46, m | 35.2       | 2.71, dd<br>2.45, dd | 35.2       | 2.71, dd<br>2.45, dd |
| 30                 | 172.3      |                     | 171.8      |                      | 171.8      |                      |
| 31                 | 171.4      |                     | 170.9      |                      | 170.9      |                      |
| 28-NH              |            | 8.70, d             |            | 8.68, d              |            | 8.68, d              |
| 30-NH <sub>2</sub> |            | 7.37, s<br>6.86, d  |            | 7.35, s<br>6.82, s   |            | 7.35, s<br>6.82, s   |
| 32                 | 56.6       | 4.14, s             | 56.1       | 4.16, m              | 56.1       | 4.16, m              |

|       |           |              |           |              |           |              |
|-------|-----------|--------------|-----------|--------------|-----------|--------------|
| 33    | 61.8      | 3.64, m      | 61.3      | 3.66, d      | 61.3      | 3.66, d      |
| 34    | 171.0     |              | 170.6     |              | 170.6     |              |
| 32-NH |           | 7.31, d      |           | 7.31, d      |           | 7.31, d      |
| 33-OH |           | 4.86, m      |           | 4.83, br     |           | 4.83, br     |
| 35    | 45.8      | 3.98, m      | 45.3      | 3.97, m      | 45.4      | 3.97, m      |
| 36    | 42.2      | 2.32, d      | 41.7      | 2.33, m      | 41.7      | 2.33, m      |
| 37    | 171.7     |              | 171.2     |              | 171.2     |              |
| 38    | 35.0      | 1.41, m      | 34.6      | 1.40, m      | 34.6      | 1.40, m      |
| 39    | 25.8      | 1.29-1.07, m | 25.3      | 1.28-1.08, m | 25.3      | 1.28-1.08, m |
| 40-45 | 29.1-29.6 | 1.29-1.07, m | 28.6-29.1 | 1.28-1.08, m | 28.6-29.1 | 1.28-1.08, m |
| 46    | 29.1-29.6 | 1.29-1.07, m | 31.3      | 1.28-1.08, m | 28.6-29.1 | 1.28-1.08, m |
| 47    | 31.8      | 1.29-1.07, m | 22.0      | 1.28-1.08, m | 31.2      | 1.28-1.08, m |
| 48    | 22.6      | 1.29-1.07, m | 13.9      | 0.84, t      | 22.0      | 1.28-1.08, m |
| 35-NH |           | 7.11, ovl    |           | 7.12, d      |           | 7.12, d      |
| 49    | 14.4      | 0.83, t      |           |              | 13.9      | 0.84, t      |

Note: Only the complete NMR data of iturin A2 were reported [33]. Iturin A5 shares the same skeleton structure as iturin A2 shown by the red labeled  $\delta_C$  and  $\delta_H$  signals, the different  $\beta$ -amino acid moiety of iturin A5 was shown by the green labeled  $\delta_C$  and  $\delta_H$  signals. NMR spectroscopic data of compound 1 were corresponding to the signals of iturin A5, therefore compound 1 was identified as iturin A5. Ovl: overlapped with other signals.

**Table S5.** Effect of iturin A5 on spore germination rate of *Fusarium oxysporum* f. sp. *cubense*

| Concentration of iturin A5 (µg/ml) | Spore germination rate (%) |
|------------------------------------|----------------------------|
| 0 (Control)                        | 100                        |
| 62.5                               | 66                         |
| 125                                | 37                         |

Iturin A5 was dissolved in DMSO. Both control and treatment groups contained 5% DMSO.
